# Supplementary material for: Droplet–droplet interactions investigated using a combination of electrochemical and dynamic light scattering techniques. The case of water/BHDC/benzene:n-heptane system
Source: Royal Society of Chemistry journal article supplement (doi:10.1039/c5sm00146c), 2015-01-01
Supplement: c5sm00146c1.pdf [file c5sm00146c1.pdf]

**Droplet Droplet Interactions investigated using a Combination of  
Electrochemical and Dynamic Light Scattering Techniques. The Case of  
Water/BHDC/Benzene:*n*-Heptane System**

Juán Sebastián Florez Tabares, N. Mariano Correa, Juana J. Silber, Leonides  
E. Sereno\*, Patricia G. Molina\*

Departamento de Química. Universidad Nacional de Río Cuarto. Agencia  
Postal # 3. (X5804ALH) Río Cuarto, Argentina

**\*Corresponding author email addresses:** pmolina@exa.unrc.edu.ar,  
lsereno@exa.unrc.edu.ar

**Telephone/fax: 54-358-4676233**

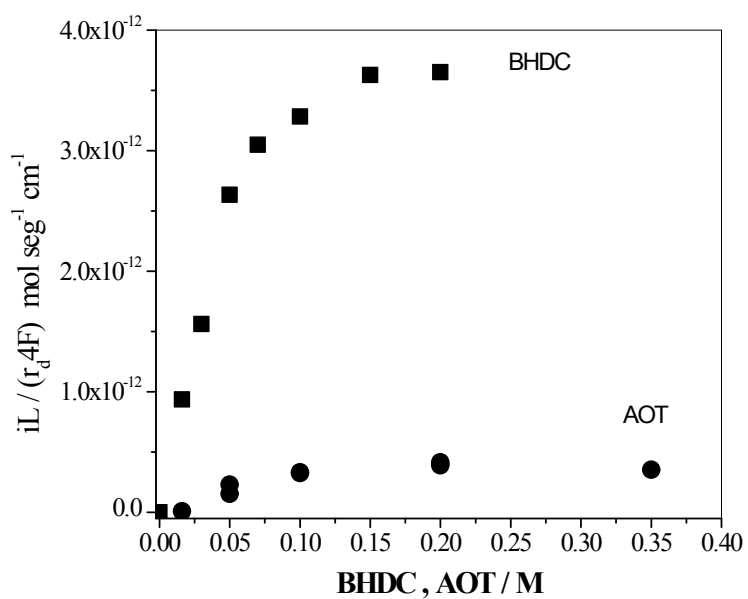

**Figure S1:** Dependence of  $i_L/r_d 4F$  ratio with [surfactant] in (■) water/BHDC/benzene:*n*-heptane 70:30% v/v system at  $W_0=5$  and (●) [AOT] in water/AOT/*n*-heptane system at  $W_0=10$ .  $[K_4[Fe(CN)_6]] = 1 \times 10^{-3}$  M,  $v = 0.01$  V s<sup>-1</sup>.
